# Supplementary material
Source: publisher figshare collection journal article supplement (https://acs.figshare.com/ndownloader/files/26436498)
Supplement: Supplementary file 1 [file 26436498]

## Supporting Information

### **Tuning Diffusion Permeability of an Anti-Retroviral Drug, Emtricitabine, via Multicomponent Crystallizations**

Vasanthi Palanisamy,<sup>a</sup> Palash Sanphui,<sup>\*a</sup> Vaskuri G S Sainaga Jyothi,<sup>b</sup> Nalini R Shastri,<sup>b</sup> Geetha Bolla,<sup>\*c</sup> Kandhan Palanisamy,<sup>a</sup> Muthuramalingam Prakash<sup>a</sup> and Venu R. Vangala<sup>d</sup>

<sup>a</sup>Department of Chemistry, Faculty of Engineering and Technology, SRM Institute of Science and Technology, SRM Nagar, Kattankulathur, Chennai TN-603203, India. Email: palashi@srmist.edu.in.

<sup>b</sup>Solid State Pharmaceutical Research Group, Department of Pharmaceutics, National Institute of Pharmaceutical Education and Research, Hyderabad-500037, India.

<sup>c</sup>Department of Chemistry, National University of Singapore, Science Drive 3, Singapore 117543 (Singapore). Email: bolla.geetha25@gmail.com

<sup>d</sup>Centre for Pharmaceutical Engineering Science, School of Pharmacy and Medical Sciences, University of Bradford, Richmond Road, Bradford BD7 1DP, United Kingdom.

## Table of Contents

|                                                                                |     |
|--------------------------------------------------------------------------------|-----|
| 1. Hydrogen bond geometry .....                                                | S3  |
| 2. SSNMR chemical shifts (ppm).....                                            | S3  |
| 3. Literature Reports of Multicomponent Solids of Drugs with Permeability..... | S4  |
| 4. Microscopic images.....                                                     | S10 |
| 5. Molecular conformations.....                                                | S10 |
| 6. PXRD comparison with simulated X-ray patterns.....                          | S11 |
| 7. DSC endotherm plots .....                                                   | S14 |
| 8. Permeability plots.....                                                     | S15 |

**Table S1.** Neutron normalized hydrogen bond geometry ( $\text{\AA}/^\circ$ ).

|                      | d (H $\cdots$ A/ $\text{\AA}$ ) | D (D $\cdots$ A/ $\text{\AA}$ ) | $\angle$ D-H $\cdots$ A/ $^\circ$ | Symmetry codes   |
|----------------------|---------------------------------|---------------------------------|-----------------------------------|------------------|
| <b>ECB-CPR</b>       |                                 |                                 |                                   |                  |
| O2-H2 $\cdots$ O4    | 2.05                            | 2.839(5)                        | 161                               | 1-x,1/2+y,1/2-z  |
| N2-H2A $\cdots$ O4   | 2.19                            | 3.019(6)                        | 170                               | -1+x,y,z         |
| N2-H2B $\cdots$ O2   | 2.15                            | 2.957(6)                        | 158                               | 1-x,-1/2+y,1/2-z |
| N4-H4 $\cdots$ N3    | 2.08                            | 2.942(5)                        | 176                               | 1+x,y,z          |
| C7-H7 $\cdots$ O4    | 2.45                            | 3.252(5)                        | 145                               | 1-x,1/2+y,1/2-z  |
| C19-H19B $\cdots$ O3 | 2.32                            | 3.225(6)                        | 156                               | 1+x,y,z          |
| <b>ECB-DHBA</b>      |                                 |                                 |                                   |                  |
| N1-H1 $\cdots$ O3    | 1.80                            | 2.6611(2)                       | 177                               | 1-x,-1/2+y,1-z   |
| N3-H3A $\cdots$ O4   | 1.90                            | 2.7592(2)                       | 176                               | 1-x,-1/2+y,1-z   |
| N3-H3B $\cdots$ O5   | 1.90                            | 2.7468(2)                       | 168                               | 1-x,1/2+y,1-z    |
| O6-H6 $\cdots$ O2    | 2.12                            | 2.8487(2)                       | 148                               | -x,1/2+y,-z      |
| C19-H19A $\cdots$ O7 | 2.54                            | 3.3009(2)                       | 135                               | 1-x,-1/2+y,-z    |
| <b>ECB-MLN</b>       |                                 |                                 |                                   |                  |
| N2-H2A $\cdots$ O6   | 1.90                            | 2.7539(11)                      | 170                               | 2-x,-1/2+y,1-z   |
| N2-H2B $\cdots$ O4   | 1.95                            | 2.7760(11)                      | 161                               | 1+x,y,1+z        |
| N3-H3 $\cdots$ O7    | 1.81                            | 2.6708(11)                      | 174                               | 2-x,-1/2+y,1-z   |
| O3-H3A $\cdots$ O8   | 2.04                            | 2.7404(11)                      | 143                               | 1-x,1/2+y,1-z    |
| C13-H13 $\cdots$ O3  | 2.55                            | 3.5060(14)                      | 166                               | -x,-1/2+y,1-z    |
| C16-H16 $\cdots$ O5  | 2.49                            | 3.3673(14)                      | 148                               | -x,-1/2+y,-z     |
| C17-H17A $\cdots$ O7 | 2.38                            | 3.2324(13)                      | 147                               | -1+x,y,z         |
| <b>ECB-MLE</b>       |                                 |                                 |                                   |                  |
| N1-H1 $\cdots$ O5    | 1.85                            | 2.7102(3)                       | 175                               | 1-x,1/2+y,1/2-z  |
| N2-H2A $\cdots$ O6   | 1.94                            | 2.7951(3)                       | 175                               | 1-x,1/2+y,1/2-z  |
| N2-H2B $\cdots$ O7   | 1.91                            | 2.7503(3)                       | 164                               | -x,1/2+y,1/2-z   |
| O7-H7 $\cdots$ O4    | 1.86                            | 2.6651(3)                       | 168                               | 2-x,-1/2+y,1/2-z |
| C12-H12B $\cdots$ O5 | 2.56                            | 3.1165(3)                       | 116                               | 1/2-x,-y,-1/2+z  |
| <b>ECB-SAC</b>       |                                 |                                 |                                   |                  |
| N1-H1A $\cdots$ O3   | 2.00                            | 2.8038(2)                       | 164                               | 1-x,1/2+y,1-z    |
| N1-H1B $\cdots$ O3   | 2.00                            | 2.7394(2)                       | 172                               | 1+x,1+y,z        |
| N4-H4 $\cdots$ N3    | 2.18                            | 2.9620(2)                       | 170                               | 1+x,1+y,z        |
| O6-H6 $\cdots$ O1    | 2.02                            | 2.7369(2)                       | 158                               | 1+x,y,z          |
| C7-H7 $\cdots$ O2    | 2.55                            | 3.3527(3)                       | 139                               | 1+x,y,z          |
| C7-H7 $\cdots$ O15   | 2.55                            | 3.0718(3)                       | 113                               | 2-x,-1/2+y,-z    |
| C8-H8A $\cdots$ O15  | 2.47                            | 3.1516(3)                       | 127                               | 2-x,-1/2+y,-z    |

**Table S2.**  $^{15}\text{N}$  SSNMR chemical shifts (ppm) of ECB binary systems.

|                 | N(1) ppm      | N(2) ppm      | N(3) ppm      | Conclusion |
|-----------------|---------------|---------------|---------------|------------|
| ECB             | -285.5/-289.6 | -179.3/-180.3 | -228.3/-237.9 | --         |
| ECB-BA (Form I) | -289.1        | -190.8        | -225.2        | Cocrystal  |
| ECB-DHBA        | -272.5        | -243.6        | -236.9        | Salt       |

**Table S3.** Literature reports of multicomponent solids of drugs with solubility/permeability.

| Sr. no. | Drug solid forms reported                                                                                                                                                                                                           | Solubility/permeability study                                                                                                  | Possible factors responsible                                                                                                                                                                            | References                                                      |
|---------|-------------------------------------------------------------------------------------------------------------------------------------------------------------------------------------------------------------------------------------|--------------------------------------------------------------------------------------------------------------------------------|---------------------------------------------------------------------------------------------------------------------------------------------------------------------------------------------------------|-----------------------------------------------------------------|
| 1       | <b>Acyclovir</b> (BCS class IV)<br>Acyclovir–maleate<br>Acyclovir–fumaric acid dihydrate<br>Acyclovir–glutaric acid                                                                                                                 | Maleate salt decreased permeability, whereas fumaric acid/glutaric acid cocrystals improved by 2-4 fold.                       | Higher log <i>P</i> and solubility (coformers), lower melting points (cocrystals) than the drug lead to improved permeability.                                                                          | Yan et al., CrystEngComm, <b>2013</b> , 15, 6457–6460.          |
| 2       | <b>Indomethacin</b> (BCS class II)<br>Indomethacin–2-hydroxy, 4-methylpyridine (cocrystal 1)<br>Indomethacin–2-methoxy, 5-nitroaniline (cocrystal 2)<br>Indomethacin–saccharine (cocrystal 3)                                       | Apparent permeation coefficient for cocrystals 1 and 3 increased compared to native drug and that of cocrystal 2 is decreased. | Enhanced permeability of cocrystal 1 was correlated with its improved dissolution and loss of barrier effect of the monolayer.                                                                          | Ferretti et al. Mol. Pharmaceutics <b>2015</b> , 12, 1501–1511. |
| 3       | <b>Hydrochlorothiazide</b> (BCS class IV)<br>Hydrochlorothiazide–nicotinic acid<br>Hydrochlorothiazide–nicotinamide<br>Hydrochlorothiazide–4-aminobenzoic acid<br>Hydrochlorothiazide–resorcinol<br>Hydrochlorothiazide–succinamide | All the cocrystals (except succinamide one) improved permeability/diffusion (max. 2 fold) compared to the drug.                | Absence of (drug) sulfonamide dimer/catemer synthon in nicotinic acid/ nicotinamide cocrystals lead to enhance permeability. Both polar/non-polar interactions have pivotal role in improved diffusion. | Sanphui et al., Mol. Pharmaceutics <b>2015</b> , 12, 1615-1622. |
| 4       | <b>Theophylline</b> (BCS class I)<br>Theophylline–o-aminobenzoic acid<br>Theophylline–o-aminobenzoic acid                                                                                                                           | Flux of theophylline–o-aminobenzoic acid cocrystal hydrates and solvates                                                       | Weaker heterosynthon and layers structure between theophylline and o-                                                                                                                                   | Saikia et al., Cryst. Growth Des. <b>2015</b> , 15, 5593–5603.  |

|   |                                                                                                                                                                                                                                                                                                   |                                                                                                                                                     |                                                                                                                                                               |                                                                     |
|---|---------------------------------------------------------------------------------------------------------------------------------------------------------------------------------------------------------------------------------------------------------------------------------------------------|-----------------------------------------------------------------------------------------------------------------------------------------------------|---------------------------------------------------------------------------------------------------------------------------------------------------------------|---------------------------------------------------------------------|
|   | (isobutanol solvate)<br>Theophylline–o-aminobenzoic acid hydrates<br>Theophylline–m-aminobenzoic acid<br>Theophylline–p-aminobenzoic acid                                                                                                                                                         | exhibited improved diffusion rate (1.3-1.7 fold) compared to its anhydrous cocrystal and others including the drug.                                 | aminobenzoic acid improved solubility and diffusion compared to m/p-aminobenzoic acid cocrystals.                                                             |                                                                     |
| 5 | <b>5-Fluorouracil</b> (BCS class III)<br>5-Fluorouracil–3-hydroxybenzoic acid<br>5-Fluorouracil–4-aminobenzoic acid<br>5-Fluorouracil– cinnamic acid                                                                                                                                              | All the cocrystals improved diffusion/flux than the drug. Cinnamic acid cocrystal showed max. diffusion/flux (1.8 fold)                             | Drug-coformer heterosynthons, lower crystal density of cocrystals and higher log <i>P</i> (coformers) are correlated with improved diffusion behavior.        | Dai et al., <i>Cryst. Growth Des.</i> <b>2016</b> , 16, 4430–4438.  |
| 6 | <b>Furosemide</b> (BCS class IV)<br>Furosemide– anthranilamide<br>Furosemide–4-toluamide<br>Furosemide–2-picolinamide<br>Furosemide–piperazine<br>Furosemide–2,3,5,6-tetramethylpyrazine<br>Furosemide–pyrazine<br>Furosemide–2-picolinic acid<br>Furosemide–isoniazid<br>Furosemide–theophylline | All the cocrystals and salts improved permeability compared to the native drug. Tetramethylpiperazine cocrystal exhibited highest flux of the drug. | Heterosynthons, higher improved solubility in the cocrystals/salts and hydrophobic nature of the coformers are considered for improved diffusion of the drug. | Banik et al. <i>Cryst. Growth Des.</i> <b>2016</b> , 16, 5418–5428. |
| 7 | <b>Norfloxacin-sulfathiazole</b> (BCS class IV, II)<br>Norfloxacin-sulfathiazole salt hydrate                                                                                                                                                                                                     | Salt improved diffusion permeability compared to their physical mixture.                                                                            | Lower melting point and higher solubility are correlated with improved diffusion behavior                                                                     | Gopi et al., <i>Mol. Pharmaceutics</i> <b>2016</b> , 13, 3590–3594. |
| 8 | <b>Hydrochlorothiazide</b> (BCS class IV)                                                                                                                                                                                                                                                         | Piperazine and picolinamide                                                                                                                         | Higher diffusion/flux of the                                                                                                                                  | Gopi et al., <i>Cryst. Growth</i>                                   |

|    |                                                                                                                                                                                                         |                                                                                                                          |                                                                                                                                 |                                                                         |
|----|---------------------------------------------------------------------------------------------------------------------------------------------------------------------------------------------------------|--------------------------------------------------------------------------------------------------------------------------|---------------------------------------------------------------------------------------------------------------------------------|-------------------------------------------------------------------------|
|    | Hydrochlorothiazide–piperazine<br>Hydrochlorothiazide–picolinamide<br>Hydrochlorothiazide–malonamide<br>Hydrochlorothiazide–isoniazide<br>Hydrochlorothiazide–tetramethylpyrazine                       | cocrystals improved diffusion/flux compared to the drug alone. Other cocrystals showed comparable diffusion as the drug. | cocrystals are correlated with their higher solubility.                                                                         | <i>Des.</i> <b>2017</b> , 17, 308–316.                                  |
| 9  | <b>Ethenzamide</b> (BCS class II)<br>Ethenzamide–2,5-dihydroxybenzoic acid<br>Ethenzamide–2,6-dihydroxybenzoic acid<br>Ethenzamide–3,4-dihydroxybenzoic acid<br>Ethenzamide–3,5-dihydroxybenzoic acid   | Cocrystals improved solubility and permeability compared to the native drug in pH 7 phosphate buffer medium              | Improved solubility and permeability are explained based on heterosynthons, conformations of the drug and logP of the cofomers. | Khatodia et al. <i>CrystEngComm</i> , <b>2017</b> , 19, 6992–7000.      |
| 10 | <b>Meloxicam</b> (BCS class II)<br>Meloxicam–salicylic acid                                                                                                                                             | Cocrystal showed enhanced drug permeation coefficient                                                                    | Drug-coformer interactions enhanced both drug solubility and cutaneous permeation.                                              | Machado et al. <i>Eur. J. Pharm. Sci.</i> , <b>2018</b> , 123, 184–190. |
| 11 | <b>Entacapone</b> (BCS class IV)<br>Entacapone–acetamide<br>Entacapone–nicotinamide<br>Entacapone–isonicotinamide<br>Entacapone–pyrazinamide<br>Entacapone–isoniazid<br>Entacapone–theophylline hydrate | Entacapone–theophylline hydrate exhibited improved solubility/permeability.                                              | Higher diffusion was correlated with high solubility/permeability of coformer theophylline.                                     | Bommaka et al. <i>Cryst. Growth Des.</i> <b>2018</b> , 18, 6061–6069.   |
| 12 | <b>Acetazolamide</b> (BCS class IV)<br>Acetazolamide–theophylline<br>Acetazolamide–piperazine (salt) hydrate                                                                                            | Theophylline cocrystal and piperazine salt hydrate improve diffusion of the drug                                         | Acetazolamide dimers forming layers structures and hydrophobic interactions                                                     | Zhang et al. <i>J. Mol. Struc.</i> <b>2019</b> , 1184, 225–232.         |

|    |                                                                                                                                                                                                                    |                                                                                                                                                                            |                                                                                                                                |                                                                |
|----|--------------------------------------------------------------------------------------------------------------------------------------------------------------------------------------------------------------------|----------------------------------------------------------------------------------------------------------------------------------------------------------------------------|--------------------------------------------------------------------------------------------------------------------------------|----------------------------------------------------------------|
|    |                                                                                                                                                                                                                    | by 1.5 and 2.2 fold.                                                                                                                                                       | between the layers promote higher diffusion of the drug                                                                        |                                                                |
| 13 | <b>Acetazolamide</b> (BCS class IV)<br>Acetazolamide–proline                                                                                                                                                       | The cocrystal improve cumulative diffusion by 2 fold compared to the native drug.                                                                                          | Higher lipophilicity of proline and heterosynthons in the cocrystal leads to low polarity and high lipophilicity/permeability. | Song et al. CrystEngComm, <b>2019</b> , 21, 3064-3073.         |
| 14 | <b>5-Fluorouracil</b> (BCS class III)<br>5-Fluorouracil–salicylic acid<br>5-Fluorouracil–3-hydroxybenzoic acid<br>5-Fluorouracil–4-hydroxybenzoic acid<br>(Forms I/II)                                             | All the cocrystals improve permeability/diffusion rate compared to the native drug.                                                                                        | Cocrystals with higher lipid solubility and lower lattice energy are correlated with improved diffusion behavior.              | Dai et al. CrystEngComm, <b>2019</b> , 21, 5095–5105.          |
| 15 | <b>Naftopidil</b> (BCS class IV)<br>Naftopidil–oxalate<br>Naftopidil–succinate<br>Naftopidil–D-malate<br>Naftopidil–L-malate<br>Naftopidil–DL-malate<br>Naftopidil–isonicotinate<br>Naftopidil–3,5-dinitrobenzoate | Except nicotinate salt, other salts exhibited rapid increase of flux compared to native drug. The malate salts improved flux by 4 folds and permeability up to 16 times. . | High permeability of the salts was correlated improved solubility/dissolution rates.                                           | Mannava et al. Cryst. Growth Des. <b>2020</b> , 20, 3064–3076. |
| 16 | <b>Etodolac</b> (BCS class II)<br>Etodolac–isopropylamine<br>Etodolac–n-hexylamine<br>Etodolac–cyclohexylamine                                                                                                     | Etodolac–isopropylamine salt exhibited highest dissolution and diffusion.                                                                                                  | Improved diffusion rate was correlated with higher molecular mobility and dissolution rate.                                    | Rai et al. Cryst. Growth Des. <b>2020</b> , 20, 4512–4522.     |

|    |                                                                                                                                     |                                                                                                                             |                                                                                                                                                    |                                                                   |
|----|-------------------------------------------------------------------------------------------------------------------------------------|-----------------------------------------------------------------------------------------------------------------------------|----------------------------------------------------------------------------------------------------------------------------------------------------|-------------------------------------------------------------------|
|    | Etodolac–2-phenylethylamine<br>Etodolac–piperazine                                                                                  |                                                                                                                             |                                                                                                                                                    |                                                                   |
| 17 | <b>Allopurinol</b> (BCS class IV)<br>Allopurinol–piperazine<br>Allopurinol–2,4-dihydroxybenzoic acid<br>Allopurinol–isonicotinamide | Allopurinol–piperazine<br>cocrystal improved<br>diffusion/membrane<br>permeability                                          | Weaker interactions between<br>allopurinol and piperazine and<br>lower solubility and density<br>lead to higher diffusion.                         | Dai et al. Cryst. Growth<br>Des. <b>2020</b> , 20, 5160–<br>5168. |
| 18 | <b>Furosemide</b> (BCS class IV)<br>Furosemide–imidazole (salt)<br>Furosemide–5-fluorocytosine                                      | Binary systems improved<br>cellular transport by 2-3 fold<br>across Caco-2 monolayers.                                      | Improved diffusion was<br>correlated with enhanced<br>solubility of the salt compared<br>to the cocrystal.                                         | Diniz et al. Int. J. Pharm.<br><b>2020</b> , 587, 119694.         |
| 19 | <b>Nicorandil</b> (BCS class III)<br>Nicorandil oxalate<br>Nicorandil fumarate<br>Nicorandil succinate<br>Nicorandil–suberic acid   | All the salts and cocrystal<br>improved solubility,<br>dissolution rate and<br>permeability compared to the<br>native drug. | Improved solubility was<br>correlated with ionic nature of<br>the salts and permeability was<br>correlated with hydrophobicity<br>of suberic acid. | Mannava et al.<br>CrystEngComm, <b>2021</b> ,<br>23, 227-237      |

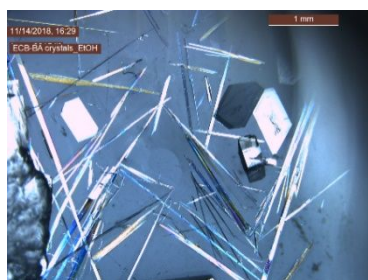

ECB-BA Cocrystal: Form I (block), II (fibers)

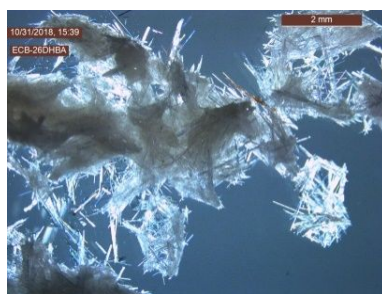

ECB-DHBA Salt

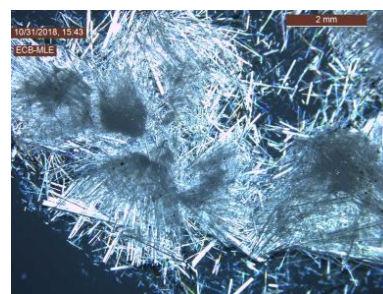

ECB-MLE Salt

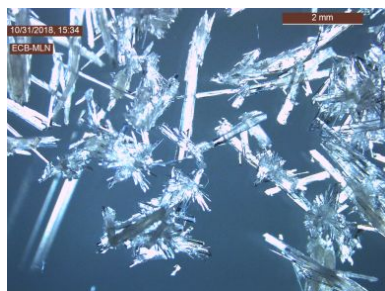

ECB-MLN salt

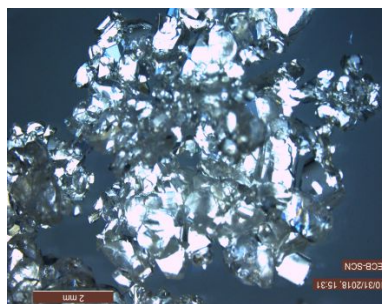

ECB-SAC salt

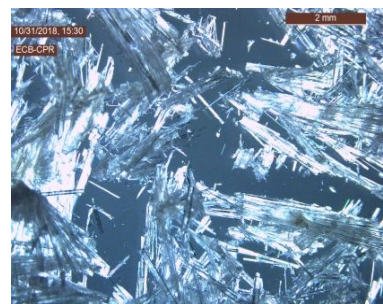

ECB-CPR cocrystal

**Figure S1.** Microscopic images of ECB multicomponent molecular crystals.

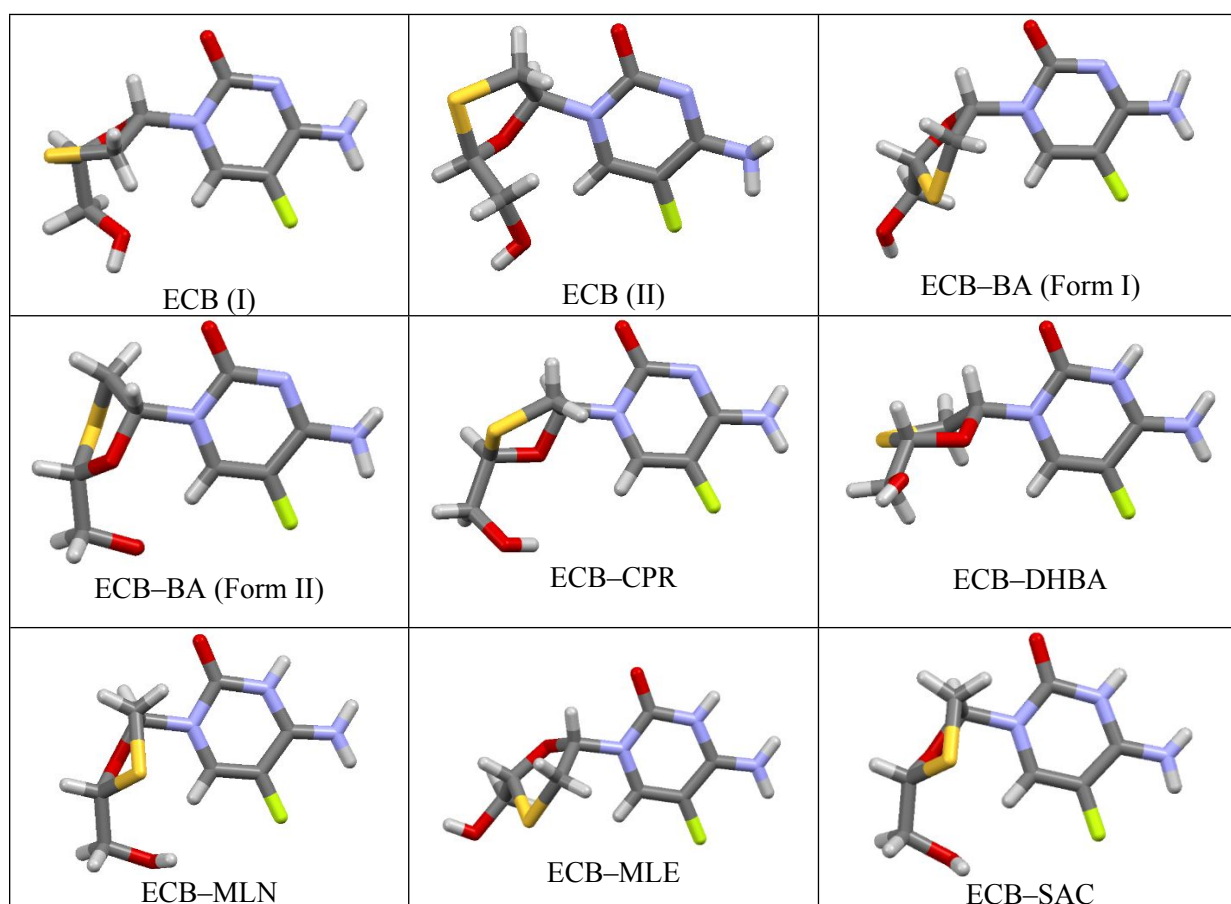

**Figure S2.** Molecular conformations of ECB in the drug and its multicomponent solids.

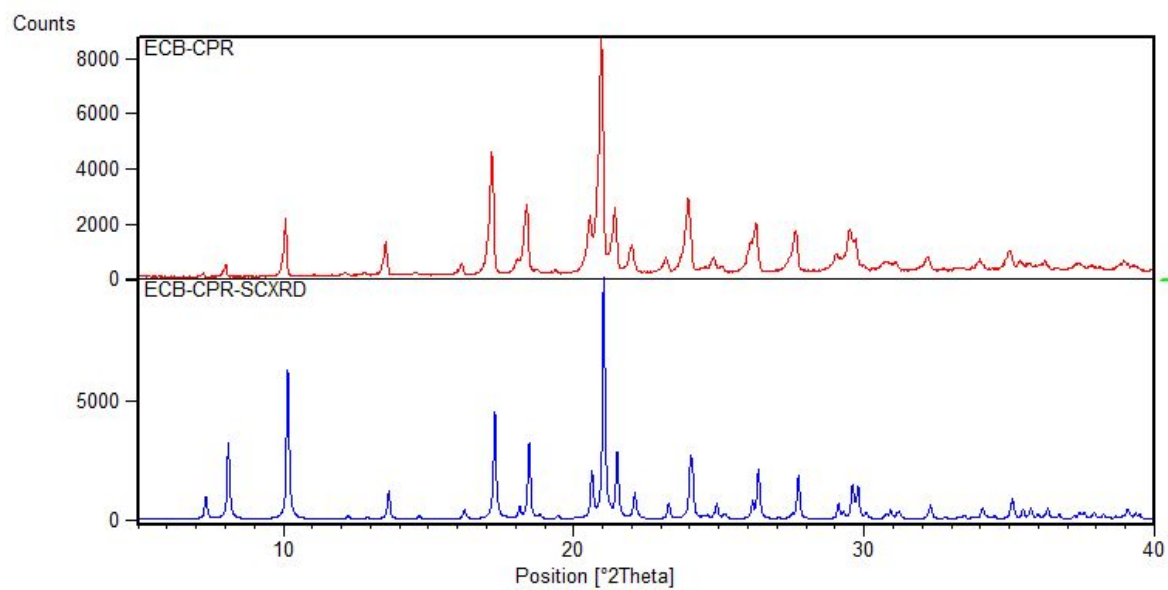

(a)

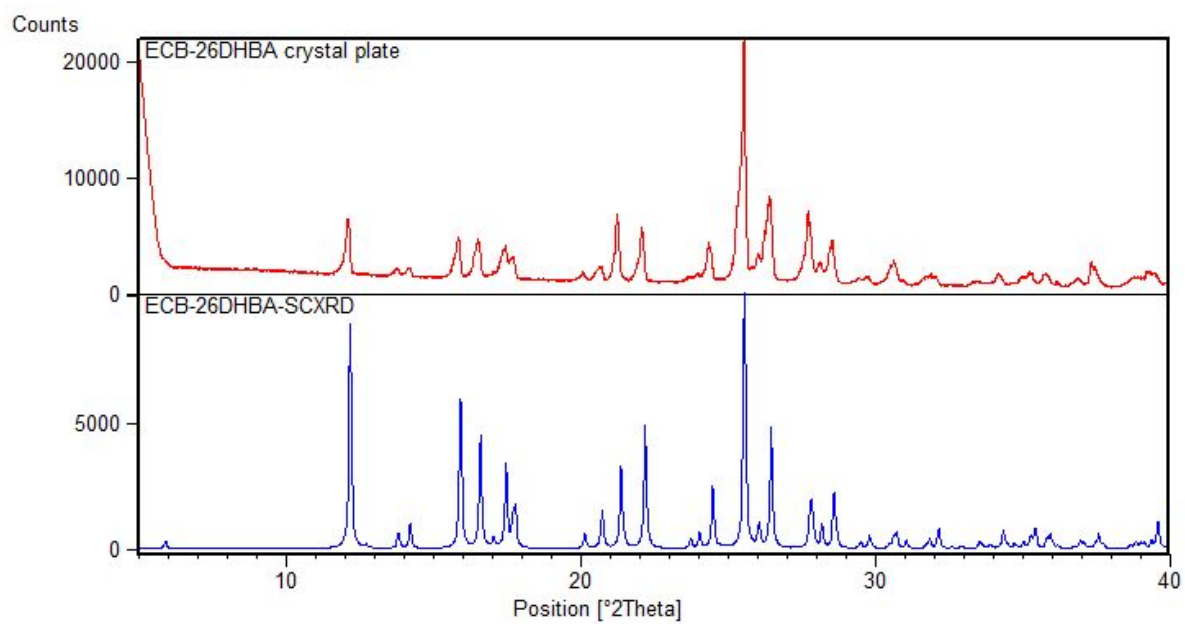

(b)

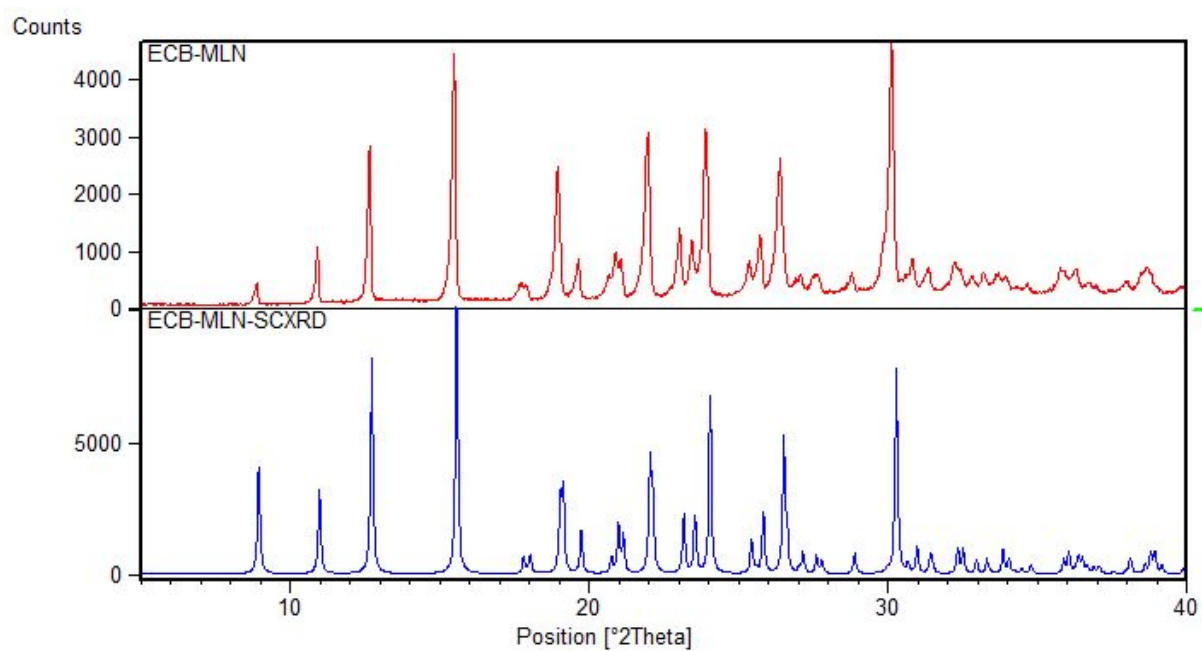

(c)

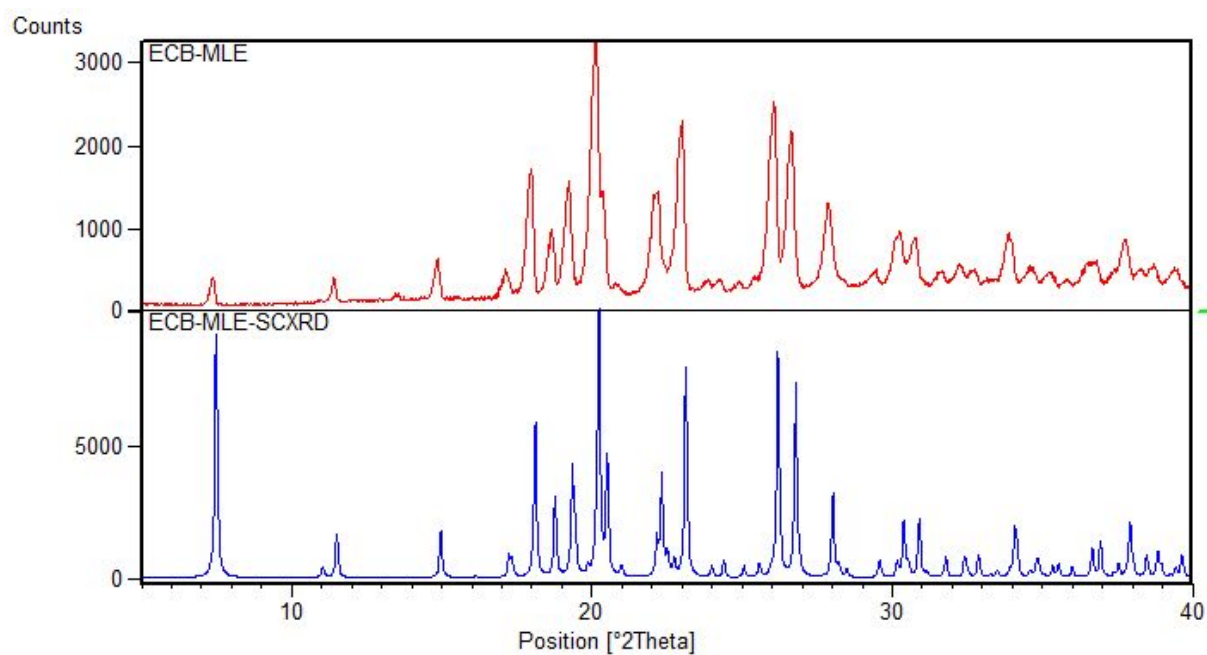

(d)

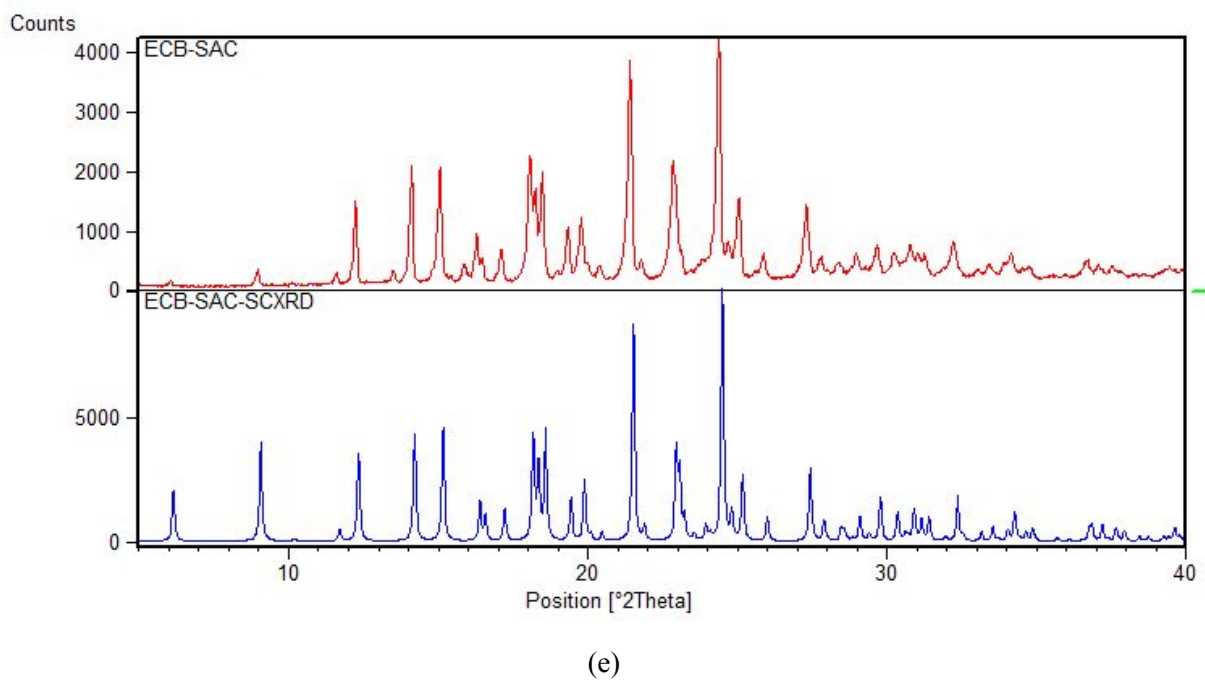

**Figure S3.** PXRD (red trace) comparison of (a) ECB-CPR, (b) ECB-DHBA, (c) ECB-MLN, (d) ECB-MLE, and (e) ECB-SAC with the corresponding simulated X-ray patterns (blue trace).

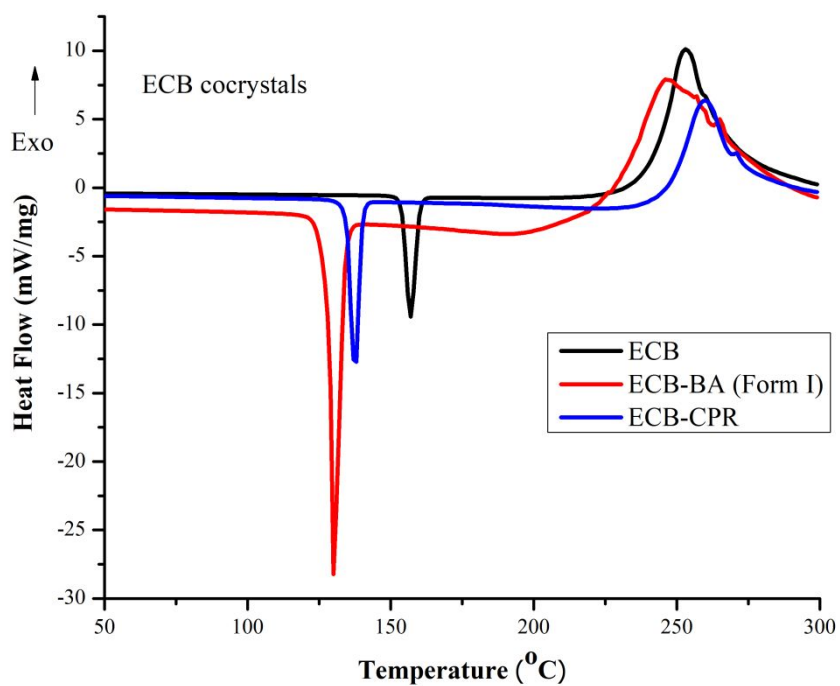

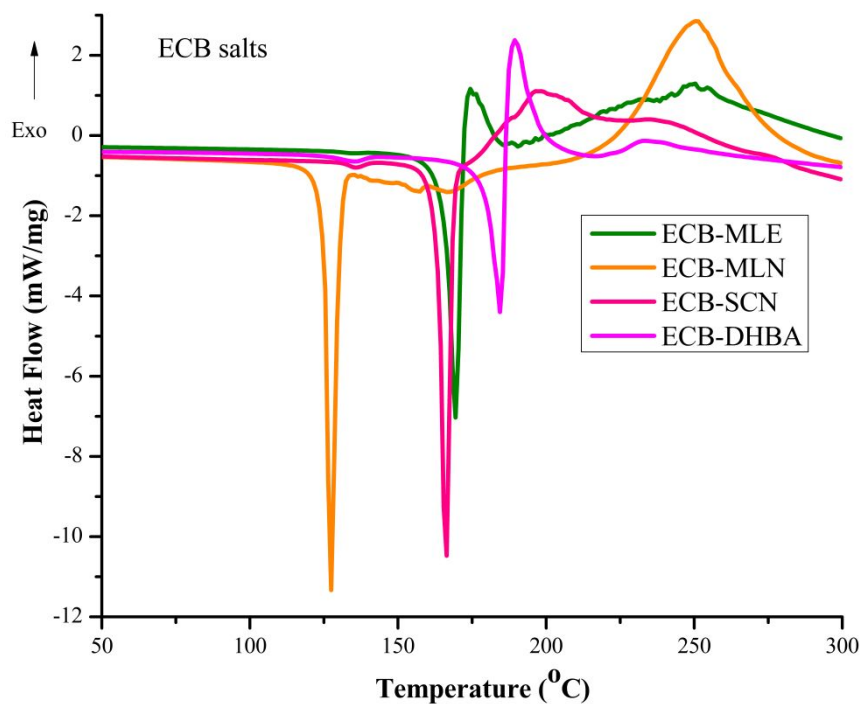

(b)

**Figure S4.** DSC endotherms of ECB cocrystals and salts indicate melting endotherms of ECB-BA/CPR (red, blue traces) is lower than that of the drug (black trace), whereas melting endotherms of salts like ECB-MLE/DHBA/SAC (except ECB-MLN salt, orange trace) are higher than that of the drug.

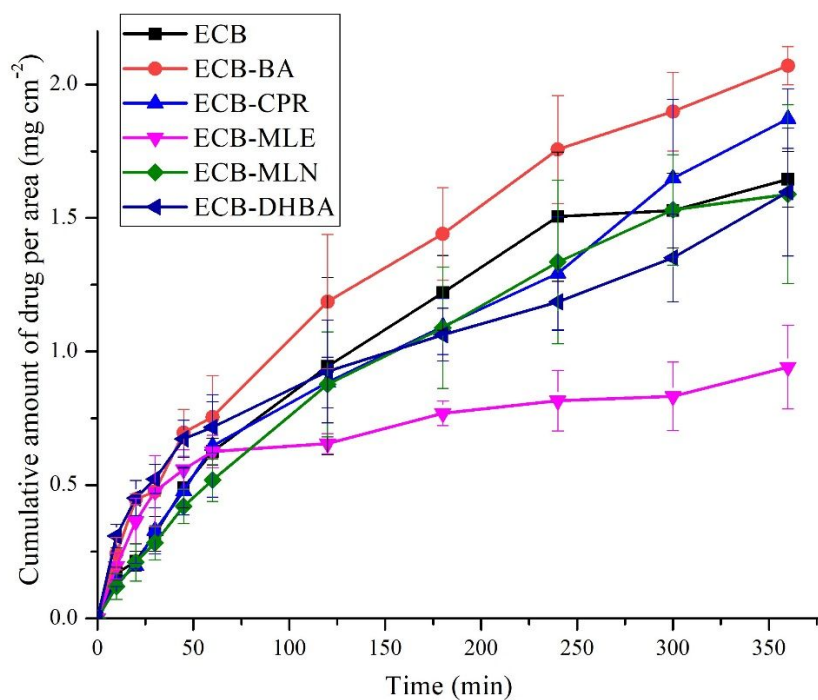

**Figure S5.** Cumulative amount of drug diffused per unit area vs time (min) of all the multicomponent systems.

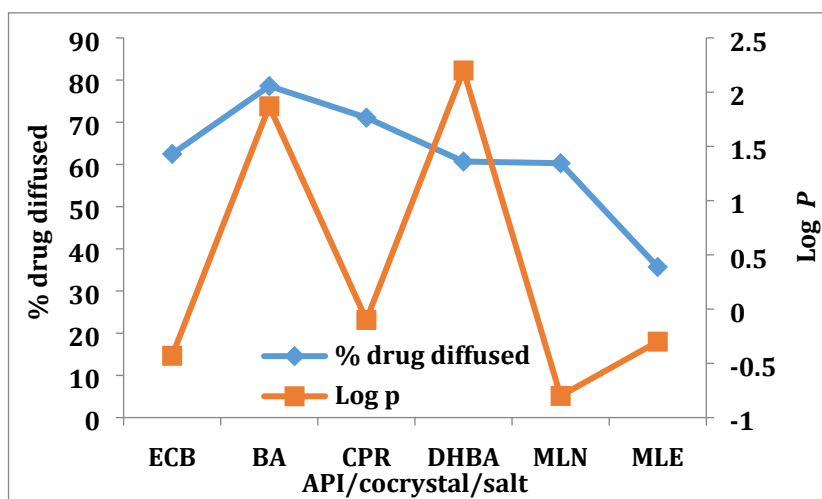

Figure S6. Correlation between % drug diffused and log *P* of the drug/coformers.

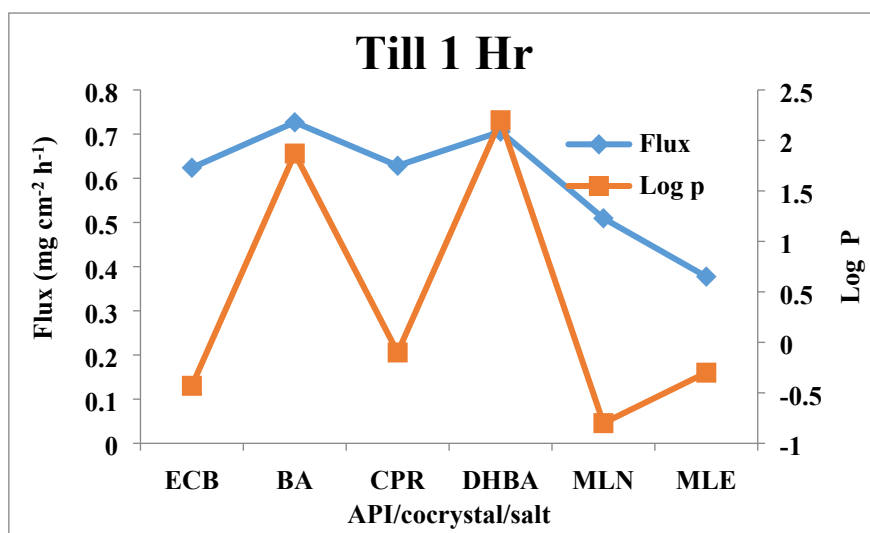

(a)

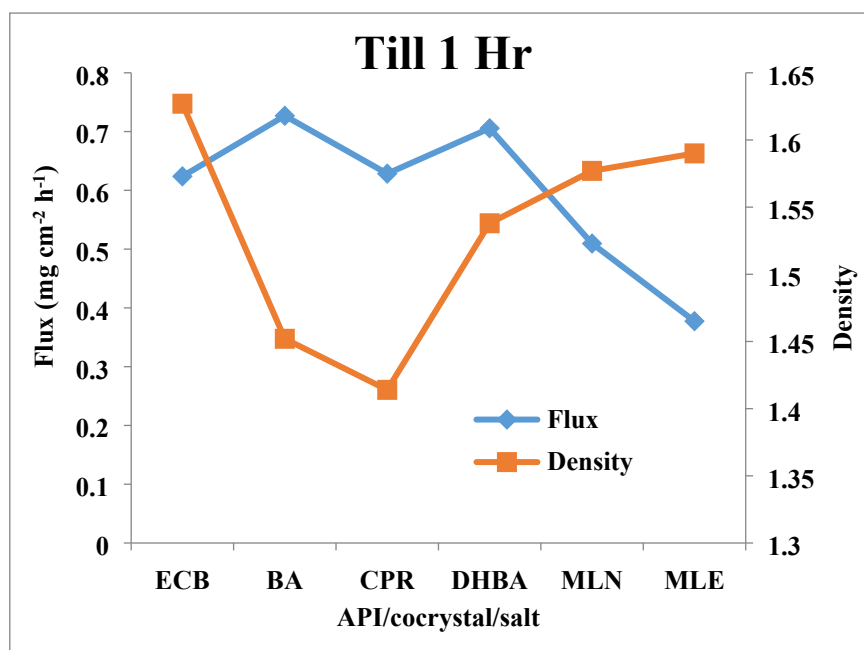

(b)

**Figure S7.** Correlation between (a) flux and  $\log P$  and (b) flux and calculated density (from crystal structures) of the ECB multicomponent solids.
